# Supplementary material
Source: Springer Nature journal article supplement (https://www.springermedizin.de/resource/supplementary/12950_2008_77_MOESM2_ESM.pdf/9557910)

absorbance

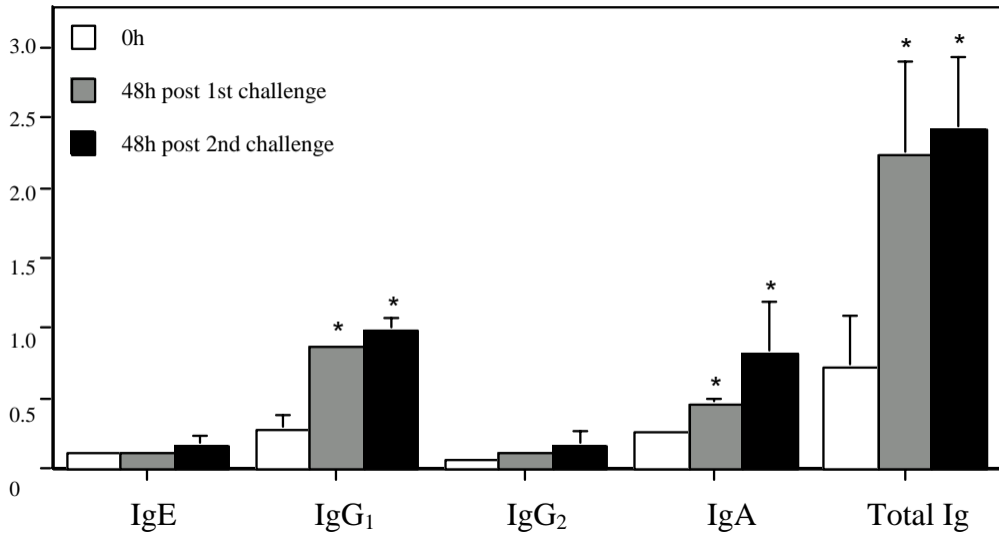

Supplement: MOESM2 [file 9557910]
